# Supplementary material for: High Throughput scRNA-Seq Provides Insights Into Leydig Cell Senescence Induced by Experimental Autoimmune Orchitis: A Prominent Role of Interstitial Fibrosis and Complement Activation
Source: PubMed Central journal article supplement (PMC8801941; doi:10.3389/fimmu.2021.771373), 2022-01-17
Supplement: Table_S1.pdf [file Table_S1.pdf]

| Signatures                   | Genes                                                                                                                                                                                                                                                                                                                                                            |
|------------------------------|------------------------------------------------------------------------------------------------------------------------------------------------------------------------------------------------------------------------------------------------------------------------------------------------------------------------------------------------------------------|
| Senescence_signature         | "Cdkn1a","Cdkn1b","Cdkn1c","Cdkn2a","Cdkn2b","Cdkn2c","Cdkn2d"                                                                                                                                                                                                                                                                                                   |
| Androgen_synthesis_signature | "Cyp11a1","Cyp17a1","Hsd3b1","Star"                                                                                                                                                                                                                                                                                                                              |
| mCRPs                        | Cd59a, 'Cd59b', 'Cd55b', 'Cd55', 'Cd46'                                                                                                                                                                                                                                                                                                                          |
| Complement                   | Serping1, 'C1qbp', 'C2', 'C1s1', 'C1ra', 'C1rl', 'C7', 'Cr11', 'C4b', 'C3', 'Masp1', 'Cfp', 'C8g', 'C8b', 'C1qb', 'Cfhr3', 'C6', 'C1qc', 'C1qa', 'C3ar1', 'Cfh', 'Colec11', 'Hc', 'C4a', 'Cfhr1', 'C8a', 'C9', 'A1cf', 'Crp', 'C1ql4', 'C1s2', 'Mbl2', 'C4bp', 'Masp2', 'C1rb', 'Cr2', 'C1ql1', 'Cfi', 'Cfb', 'Cr11'                                             |
| Collagen                     | Col11a1', 'Col11a2', 'Col12a1', 'Col13a1', 'Col14a1', 'Col15a1', 'Col16a1', 'Col17a1', 'Col18a1', 'Col19a1', 'Col1a1', 'Col1a2', 'Col22a1', 'Col23a1', 'Col26a1', 'Col27a1', 'Col28a1', 'Col2a1', 'Col3a1', 'Col4a1', 'Col4a2', 'Col4a3', 'Col4a4', 'Col4a5', 'Col4a6', 'Col5a1', 'Col5a2', 'Col6a1', 'Col6a2', 'Col6a3', 'Col7a1', 'Col8a1', 'Col9a1', 'Col9a3' |
